# Supplementary material
Source: Springer Nature journal article supplement (https://www.springermedizin.de/resource/supplementary/12936_2008_838_MOESM6_ESM.pdf/9549056)

# Pfdhfr - N51I C59R S108N - SP

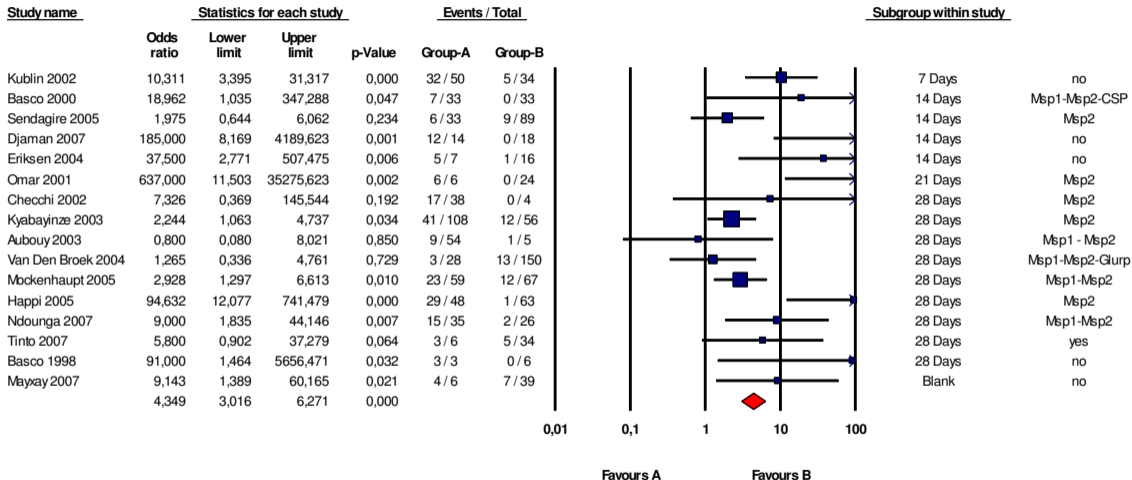

Supplement: MOESM6 [file 9549056]
